# Supplementary material for: A structural investigation of novel thiophene-functionalized BEDT-TTF donors for application as organic field-effect transistors
Source: Royal Society of Chemistry journal article supplement (doi:10.1039/c4ce01686f), 2014-09-26
Supplement: c4ce01686f1.pdf [file c4ce01686f1.pdf]

## Supporting Information

# A structural investigation of novel thiophene functionalized BEDT-TTF donors for application as organic field effect transistors

Qiang Wang,<sup>a</sup> John D. Wallis,<sup>b</sup> Yiliang Wu<sup>c</sup> and Melanie Pilkington<sup>a\*</sup>

<sup>a</sup> Department of Chemistry,  
Brock University,  
500 Glenridge Avenue, St Catharines, ON,  
L2S 3A1, Canada.  
Tel: +1 (905) 688 5550 ext. 3403  
E-mail: mpilkington@brocku.ca

<sup>b</sup> School of Science and Technology,  
Nottingham Trent University,  
Clifton Lane, Nottingham, NG11 8NS, UK.

<sup>c</sup> Xerox Research Centre of Canada,  
2660 Speakman Drive,  
Mississauga, ON, L5K 2L1, Canada.

## Contents

|                                                            |   |
|------------------------------------------------------------|---|
| S-1 Preparation and configuration of the OFET device ..... | 2 |
| S-2 Tables of bond lengths and angles for 1.....           | 3 |
| S-3 Tables of bond lengths and angles for 2.....           | 5 |

## S-1 Preparation and configuration of the OFET device

Fig. 1 shows a schematic cross section of the organic thin-film field effect transistor (OTFTs) device configuration. An n-doped Si wafer with a 110 nm thermally grown silicon dioxide layer (capacitance of 32 nF/cm<sup>2</sup>) was used as the substrate. Semiconductor films were deposited by spin coating 1 wt.% of chlorobenzene solution of the tested compound onto octyltrichlorosilane (OTS) modified or unmodified substrates, respectively, at 1000 rpm for 45 s. Gold source and drain electrodes were then deposited on top of the substrates by vacuum evaporation through a shadow mask with various channel lengths and widths, thus creating a series of transistors of various dimensions by bridging crystals as active channels over the drain-source electrodes.

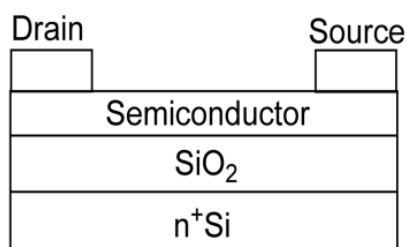

**Fig.1.** Schematic diagram of the configuration of an OTFT device.

## S-2 Tables of bond lengths and angles for 1

| Bond                              | Distance (Å) | Bond                               | Distance (Å) |
|-----------------------------------|--------------|------------------------------------|--------------|
| S1-C1                             | 1.809(5)     | C9-C10                             | 1.534(5)     |
| S1-C3                             | 1.751(4)     | C9-C11                             | 1.522(5)     |
| S2-C2                             | 1.798(5)     | C11-C12                            | 1.512(5)     |
| S2-C4                             | 1.748(4)     | C13 -C14                           | 1.437(5)     |
| S3-C3                             | 1.773(4)     | C14-C15                            | 1.395(5)     |
| S3-C5                             | 1.755(3)     | C14-C15 <sup>#</sup>               | 1.351(4)     |
| S4-C4                             | 1.770(4)     | C15-C16                            | 1.389(6)     |
| S4-C5                             | 1.755(3)     | C15 <sup>#</sup> -C16 <sup>#</sup> | 1.421(17)    |
| S5-C6                             | 1.754(3)     | C16-C17                            | 1.338(5)     |
| S5-C7                             | 1.769(3)     | C16 <sup>#</sup> -C17 <sup>#</sup> | 1.35(2)      |
| S6-C6                             | 1.747(3)     | S6 -C8                             | 1.761(3)     |
| S7-C7                             | 1.747(3)     |                                    |              |
| S7-C9                             | 1.824(3)     |                                    |              |
| S8-C8                             | 1.750(3)     |                                    |              |
| S8-C10                            | 1.814(4)     |                                    |              |
| S9-C14                            | 1.692(3)     |                                    |              |
| S9-C17                            | 1.733(4)     |                                    |              |
| S9 <sup>#</sup> -C14              | 1.641(5)     |                                    |              |
| S9 <sup>#</sup> -C17 <sup>#</sup> | 1.698(14)    |                                    |              |

| Bond                                    | Angle (°)  | Bond                                                    | Angle (°)  |
|-----------------------------------------|------------|---------------------------------------------------------|------------|
| C1-S1-C3                                | 100.9(2)   | S6-C8-C7                                                | 116.9(2)   |
| C2-S2-C4                                | 99.9(2)    | S8 -C8-C7                                               | 128.9(2)   |
| C3-S3-C5                                | 92.59(16)  | S6-C8-S8                                                | 113.97(15) |
| C4-S4-C5                                | 92.18(16)  | S7-C9-C11                                               | 112.2(2)   |
| C6-S5-C7                                | 93.48(14)  | C10-C9-C11                                              | 113.5(2)   |
| C6-S6-C8                                | 94.09(14)  | S7-C9-C10                                               | 110.3(2)   |
| C7-S7-C9                                | 99.59(14)  | S8-C10-C9                                               | 115.1(2)   |
| C8-S8-C10                               | 101.51(15) | C9-C11-C12                                              | 113.7(2)   |
| C14-S9-C17                              | 92.02(16)  | O1-C12-C11                                              | 111.3(3)   |
| C14-S9 <sup>#1</sup> -C17 <sup>#1</sup> | 99.3(7)    | O1-C13-O2                                               | 124.5(3)   |
| C12-O1-C13                              | 116.0(3)   | O1-C13-C14                                              | 111.0(3)   |
| S1-C1-C2                                | 114.7(4)   | O2-C13-C14                                              | 124.5(3)   |
| S2-C2-C1                                | 114.4(4)   | S9-C14-C13                                              | 122.4(3)   |
| S1-C3-S3                                | 115.3(2)   | S9-C14-C15                                              | 107.2(2)   |
| S1-C3-C4                                | 128.7(3)   | S9A-C14-C13                                             | 133.4(3)   |
| S3-C3-C4                                | 116.0(3)   | C13-C14-C15 <sup>#1</sup>                               | 119.9(3)   |
| S2-C4-S4                                | 114.3(2)   | S9A-C14-C15 <sup>#1</sup>                               | 103.1(3)   |
| S2-C4-C3                                | 128.7(3)   | C13-C14-C15                                             | 129.5(3)   |
| S4-C4-C3                                | 117.0(3)   | C14-C15-C16                                             | 117.8(3)   |
| S3-C5-C6                                | 122.9(2)   | C14-C15A-C16 <sup>#1</sup>                              | 119.6(3)   |
| S4-C5-C6                                | 124.0(2)   | C15-C16-C17                                             | 108.0(4)   |
| S3-C5-S4                                | 112.91(17) | C15 <sup>#1</sup> -C16 <sup>#1</sup> -C17 <sup>#1</sup> | 109.7(14)  |
| S5-C6-S6                                | 114.39(18) | S9-C17-C16                                              | 114.1(3)   |
| S5-C6-C5                                | 123.2(2)   | S9A-C17 <sup>#1</sup> -C16 <sup>#1</sup>                | 107.1(13)  |

|          |            |                         |        |
|----------|------------|-------------------------|--------|
| S6-C6-C5 | 122.5(2)   | S1-C1-H1 <sup>#1</sup>  | 109.00 |
| S5-C7-S7 | 114.47(14) | S1-C1-H1 <sup>#2</sup>  | 109.00 |
| S5-C7-C8 | 117.0(2)   | C2 -C1-H1 <sup>#1</sup> | 109.00 |
| S7-C7-C8 | 128.5(2)   | C2-C1-H1 <sup>#2</sup>  | 109.00 |

---

Symmetry transformations used to generate equivalent atoms:

#1 = x,y,1/2-z; #2 =1/2+x,-1/2+y,z

### S-3 Tables of bond lengths and angles for 2

| Bond   | Length (Å) | Bond    | Length (Å) |
|--------|------------|---------|------------|
| S1-C1  | 1.811(3)   | C3-C4   | 1.342(3)   |
| S1-C3  | 1.744(2)   | C5-C6   | 1.347(3)   |
| S2-C2  | 1.804(3)   | C7-C8   | 1.341(3)   |
| S2-C4  | 1.746(2)   | C9-C10  | 1.521(3)   |
| S3-C3  | 1.761(2)   | C9-C11  | 1.515(3)   |
| S3-C5  | 1.762(2)   | C12-C13 | 1.465(4)   |
| S4-C4  | 1.757(2)   | C13-C14 | 1.406(4)   |
| S4-C5  | 1.753(2)   | C14-C15 | 1.415(4)   |
| S5-C6  | 1.753(2)   | C15-C16 | 1.361(4)   |
| S5-C7  | 1.761(2)   |         |            |
| S6-C6  | 1.750(2)   |         |            |
| S6-C8  | 1.755(2)   |         |            |
| S7-C7  | 1.754(2)   |         |            |
| S7-C9  | 1.828(2)   |         |            |
| S8-C8  | 1.747(2)   |         |            |
| S8-C10 | 1.801(2)   |         |            |
| S9-C13 | 1.716(2)   |         |            |
| S9-C16 | 1.697(3)   |         |            |
| O1-C11 | 1.447(3)   |         |            |
| O1-C12 | 1.340(3)   |         |            |
| O2-C12 | 1.207(3)   |         |            |
| C1-C2  | 1.513(4)   |         |            |

| Bond       | Angle(°)   | Bond        | Angle(°)   |
|------------|------------|-------------|------------|
| C1-S1-C3   | 103.91(11) | S6-C8-C7    | 117.85(16) |
| C2-S2-C4   | 98.61(11)  | S8-C8-C7    | 126.38(16) |
| C3-S3-C5   | 94.12(10)  | S7-C9-C10   | 113.66(15) |
| C4-S4-C5   | 94.23(10)  | S7-C9-C11   | 109.14(15) |
| C6-S5-C7   | 95.09(10)  | C10-C9-C11  | 112.51(18) |
| C6-S6-C8   | 94.90(10)  | S8-C10-C9   | 112.61(15) |
| C7-S7-C9   | 103.84(10) | O1-C11-C9   | 105.76(17) |
| C8-S8-C10  | 97.08(10)  | O1-C12-O2   | 124.1(2)   |
| C13-S9-C16 | 91.40(13)  | O1-C12-C13  | 111.23(19) |
| C11-O1-C12 | 116.39(18) | O2-C12-C13  | 124.7(2)   |
| S1-C1-C2   | 115.27(17) | S9-C13-C12  | 122.41(17) |
| S2-C2-C1   | 113.7(2)   | S9-C13-C14  | 112.27(18) |
| S1-C3-S3   | 113.44(11) | C12-C13-C14 | 125.3(2)   |
| S1-C3-C4   | 129.40(17) | C13-C14-C15 | 110.0(2)   |
| S3-C3-C4   | 117.14(16) | C14-C15-C16 | 113.7(2)   |
| S2-C4-S4   | 116.19(11) | S9-C16-C15  | 112.7(2)   |
| S2-C4-C3   | 125.93(16) |             |            |
| S4-C4-C3   | 117.53(16) |             |            |
| S3-C5-S4   | 114.53(12) |             |            |
| S3-C5-C6   | 122.53(16) |             |            |
| S4-C5-C6   | 122.91(16) |             |            |
| S5-C6-S6   | 114.91(11) |             |            |
| S5-C6-C5   | 121.94(16) |             |            |
| S6-C6-C5   | 123.14(16) |             |            |

|    |     |     |            |
|----|-----|-----|------------|
| S5 | -C7 | -S7 | 114.52(11) |
| S5 | -C7 | -C8 | 116.74(16) |
| S7 | -C7 | -C8 | 128.73(16) |
| S6 | -C8 | -S8 | 115.74(11) |

---
